# Supplementary material for: Working with Commercially Available Quantum Dots for Immunofluorescence on Tissue Sections
Source: PubMed Central journal article supplement (PMC5042461; doi:10.1371/journal.pone.0163856), 2016-09-29
Supplement: pone.0163856.s001.pdf [file pone.0163856.s001.pdf]

| Product                 | 350 nm            | 405 nm            | 488 nm           | 532 nm           |
|-------------------------|-------------------|-------------------|------------------|------------------|
| Qdot® 525               | 710,000           | 360,000           | 130,000          | N/A              |
| Qdot® 565               | 1,900,000         | 1,100,000         | 290,000          | 140,000          |
| Qdot 585                | 3,500,000         | 2,200,000         | 530,000          | 305,000          |
| <b>Qdot® VIVID® 585</b> | <b>7,600,000</b>  | <b>5,300,000</b>  | <b>1,400,000</b> | <b>240,000</b>   |
| Qdot 605                | 4,400,000         | 2,800,000         | 1,100,000        | 580,000          |
| <b>Qdot® VIVID® 605</b> | <b>11,300,000</b> | <b>7,700,000</b>  | <b>1,500,000</b> | <b>420,000</b>   |
| Qdot 625                | 14,700,000        | 9,900,000         | 2,700,000        | 870,000          |
| <b>Qdot® VIVID® 625</b> | <b>14,700,000</b> | <b>9,900,000</b>  | <b>2,700,000</b> | <b>870,000</b>   |
| Qdot 655                | 9,100,000         | 5,700,000         | 2,900,000        | 2,400,000        |
| <b>Qdot® VIVID® 655</b> | <b>16,000,000</b> | <b>11,000,000</b> | <b>3,600,000</b> | <b>2,200,000</b> |
| Qdot 705                | 12,900,000        | 8,300,000         | 3,000,000        | 2,100,000        |
| <b>Qdot® VIVID® 705</b> | <b>14,000,000</b> | <b>10,000,000</b> | <b>3,400,000</b> | <b>2,200,000</b> |
| Qdot 800                | 15,800,000        | 10,600,000        | 4,100,000        | 2,100,000        |
| <b>Qdot® VIVID® 800</b> | <b>16,000,000</b> | <b>11,000,000</b> | <b>4,100,000</b> | <b>2,100,000</b> |

A

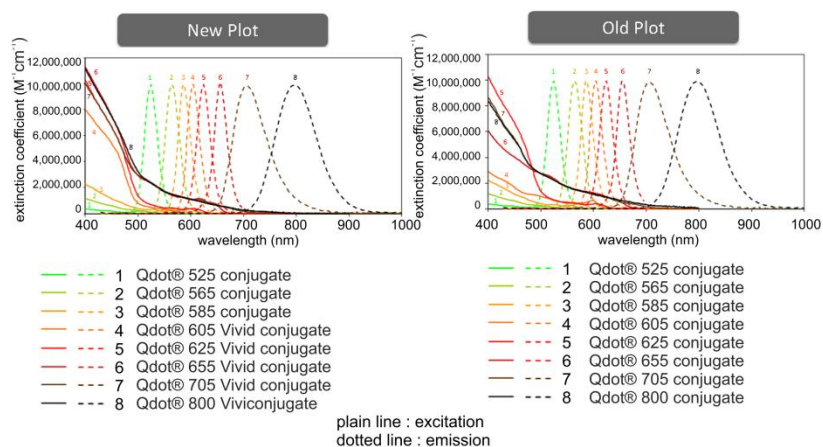

B

## Information on Original and Vivid Qdots

**A:** Molar extinction coefficients ( $M^{-1}cm^{-1}$ ) of original & Vivid Qdot nanocrystal streptavidin conjugates at indicated wavelengths ((4) for the original Qdots and information provided by life technology technical services for Vivid Qdots).

**B :** excitation and emission spectra for original and Vivid Qdots. Note that the Vivid information is not currently available in the Molecular probe book or online ; and that Qdot 625 and 800 have similar values for original and Vivid confirming that those 2 Qdots were always of the Vivid type. The currently available manual on Qdot (revised Nov-2011) secondary antibody conjugates (5) protocol does not state 585 or 605 as Vivid. Reproduced with permission from LifeTechnology
