# Supplementary material for: Working with Commercially Available Quantum Dots for Immunofluorescence on Tissue Sections
Source: PubMed Central journal article supplement (PMC5042461; doi:10.1371/journal.pone.0163856), 2016-09-29
Supplement: pone.0163856.s002.pdf [file pone.0163856.s002.pdf]

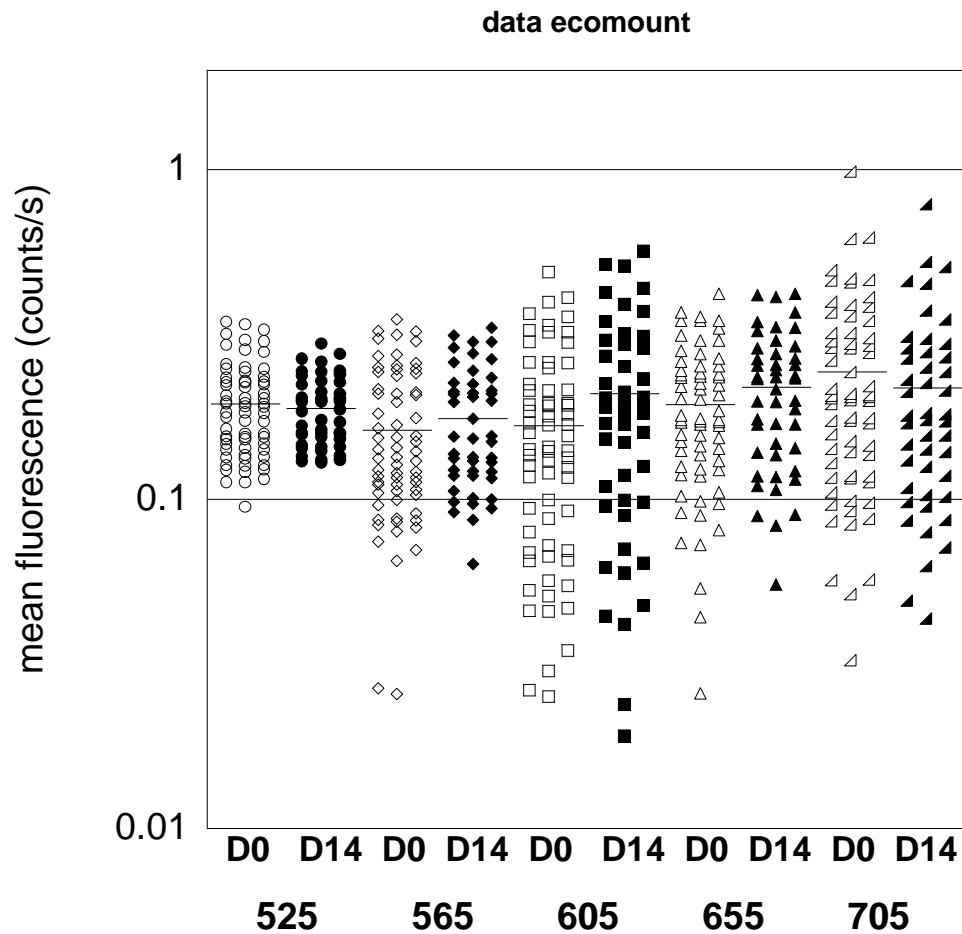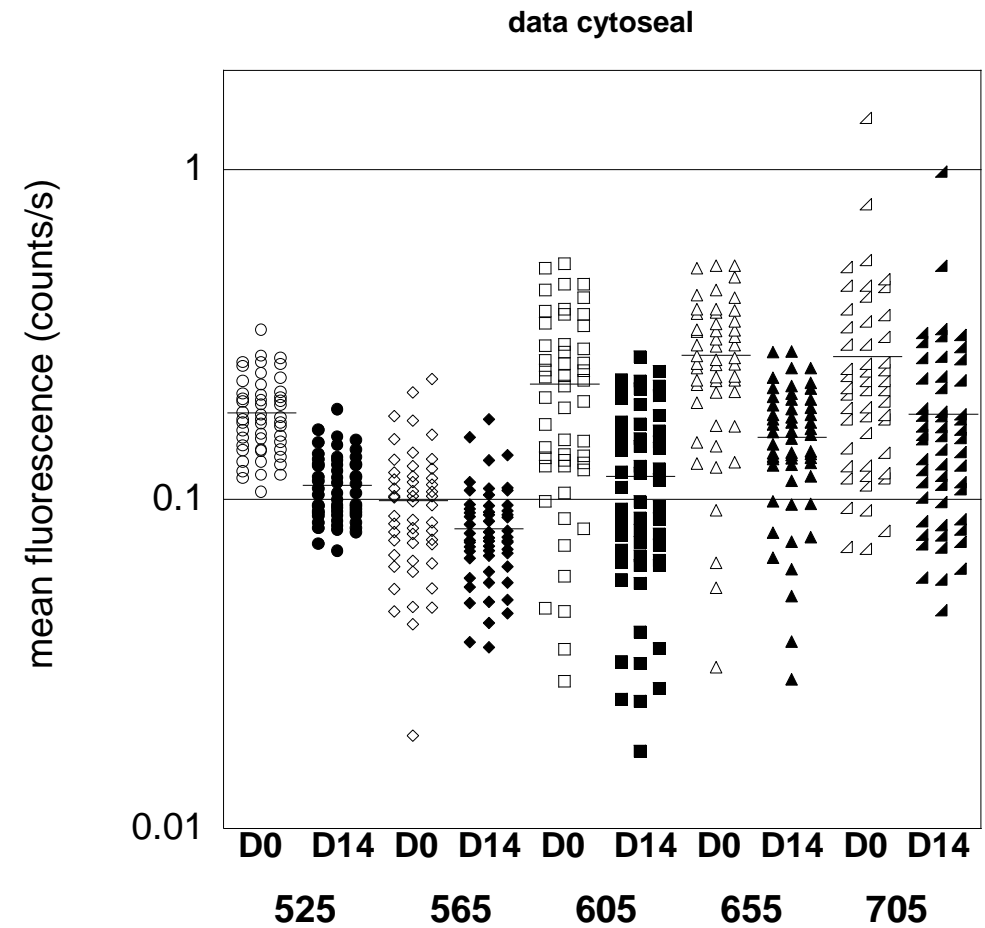

**Qdots are more stable in Ecomount than in Cytoseal**

The graph shows the mean fluorescence intensities at day 0 and Day 14 in 2 matched fields in 2 serial sections stained at the same time with a 6 color protocol multiplex ( Qdot 525, Qdot 565, Qdot 605Vivid, Qdot 655Vivid, Qdot 705 Vivid and nuclear counterstain QNuclear Red) and mounted either in Ecomount ( left) or Cytoseal (right). The images were analysed using Nuance Software on unmixed intensity images for each Qdot spectrum. Each dot correspond to a region of interest thresholded for positivity of the staining. After 14 days the fluorescence of all Qdots have decreased in cytoseal but not in Ecomount (paired T test with unequal variance below).
