# Supplementary material for: Working with Commercially Available Quantum Dots for Immunofluorescence on Tissue Sections
Source: PubMed Central journal article supplement (PMC5042461; doi:10.1371/journal.pone.0163856), 2016-09-29
Supplement: pone.0163856.s004.pdf [file pone.0163856.s004.pdf]

**Protocol 1 : Single immunostaining with original streptavidin conjugated Qdot :**

- |                                    |                  |
|------------------------------------|------------------|
| 1. Xylene                          | 15 min           |
| 2. Alcohol                         | Through 4 baths  |
| 3. Water                           | 2 min            |
| 4. Retrieval EDTA (0.1mM, Ph8)     | 12 min @pressure |
| 5. Bond wash                       | 5 min            |
| 6. Avidin/Biotin block             | 20 min           |
| 7. Primary antibodies              | 1 hour           |
| 8. Bond wash                       | 5 min            |
| 9. Biotinylated Secondary antibody | 30 min           |
| 10. Bond wash                      | 2x 5 min         |
| 11. Streptavidin Qdot              | 1 hour           |
| 12. Bond wash                      | 5 min            |
| 13. Q-nuclear red                  | 20 min           |
| 14. Tap water                      | rinse briefly    |
| 15. Alcohol                        | Through 4 baths  |
| 16. Xylene                         | Through 2 baths  |
| 17. Mount in Qmount                |                  |

Leave at room temperature in the dark for 12 hours before viewing

| Item                              | Cat number                      |
|-----------------------------------|---------------------------------|
| Avidin/Biotin blocking kit        | Vector SP-2001                  |
| Antibody diluent (1°Ab, Qdots)    | Leica, AR9352                   |
| Background reducing diluent(2°Ab) | DAKO, S3022                     |
| Bond Wash                         | Leica, AR9590                   |
| Q nuclear red                     | LifeTechnologies Q10363         |
| Mounting medium                   | InVitrogen Q10336- discontinued |

**Protocol 2 : 4 color immunostaining with original streptavidin conjugated Qdot :**

- |                                                     |                         |
|-----------------------------------------------------|-------------------------|
| 1. Xylene                                           | 15 min                  |
| 2. Alcohol                                          | Through 4 baths         |
| 3. Water                                            | 2 min                   |
| 4. Retrieval EDTA (0.1mM, Ph8)                      | 12 min @pressure        |
| 5. Bond wash                                        | 5 min                   |
| 6. Avidin/Biotin block (a few drops)                | 20 min                  |
| 7. serum-free protein block                         | 10 min                  |
| 8. Primary antibodies 1 + 2                         | Overnight at 4 degrees  |
| 9. Bond wash                                        | 5 min                   |
| 10. 1st Biotinylated Secondary antibody             | 30 min                  |
| 11. Bond wash                                       | 2x 5 min                |
| 12. 1st Streptavidin Qdot                           | 30 min                  |
| 13. Avidin/Biotin block                             | 20 min                  |
| 14. serum-free protein block                        | 10 min                  |
| 15. 2 <sup>nd</sup> Biotinylated Secondary antibody | 30 min                  |
| 16. Bond wash                                       | 2x5 min                 |
| 17. 2nd Streptavidin Qdot                           | 30 min                  |
| 18. Avidin/Biotin block                             | 20 min                  |
| 19. serum-free protein block                        | 10 min                  |
| 20. Primary antibodies 3 + 4                        | 1 hour room temperature |
| 21. Bond wash                                       | 5 min                   |
| 22. 3rd Biotinylated Secondary antibody             | 30 min                  |
| 23. Bond wash                                       | 2x5 min                 |
| 24. 3rd Streptavidin Qdot                           | 30 min                  |

- |                                         |                 |
|-----------------------------------------|-----------------|
| 25. Avidin/Biotin block                 | 20 min          |
| 26. serum-free protein block            | 10 min          |
| 27. 4th Biotinylated Secondary antibody | 30 min          |
| 28. Bond wash                           | 2x5 min         |
| 29. 4th Streptavidin Qdot               | 30 min          |
| 30. Bond wash                           | 5 min           |
| 31. Q-nuclear red                       | 20 min          |
| 32. Tap water                           | rinse briefly   |
| 33. Alcohol                             | Through 4 baths |
| 34. Xylene                              | Through 2 baths |
| 35. Mount in Qmount                     |                 |

| Item                              | Cat number                      |
|-----------------------------------|---------------------------------|
| Avidin/Biotin blocking kit        | Vector SP-2001                  |
| Antibody diluent (1°Ab, Qdots)    | Leica, AR9352                   |
| Background reducing diluent(2°Ab) | DAKO, S3022                     |
| Serum-free protein block          | Dako, X0909                     |
| Bond Wash                         | Leica, AR9590                   |
| Q nuclear red                     | LifeTechnologies Q10363         |
| Mounting medium                   | InVitrogen Q10336- discontinued |

### Protocol 3 : 4 color multiplex immunostaining with Qdots conjugated secondary antibodies

- |                                                        |                        |
|--------------------------------------------------------|------------------------|
| 1. Xylene                                              | 15 min                 |
| 2. Alcohol                                             | Through 4 baths        |
| 3. Water                                               | 2 min                  |
| 4. Retrieval EDTA (0.1mM, Ph8)                         | 12 min @pressure       |
| 5. Bond wash                                           | 5 min                  |
| 6. serum-free protein block                            | 10 min                 |
| 7. Primary antibodies 1                                | Overnight at 4 degrees |
| 8. Bond wash                                           | 3 min                  |
| 9. 1st Qdot conjugated Secondary antibody              | 30 min                 |
| 10. Bond wash                                          | 3 min                  |
| 11. Fab 1/25                                           | 10 min                 |
| 12. serum-free protein block                           | 10 min                 |
| 13. Primary antibodies 2                               | 1 hour                 |
| 14. Bond wash                                          | 3 min                  |
| 15. 2 <sup>nd</sup> Qdot conjugated Secondary antibody | 30 min                 |
| 16. Bond wash                                          | 3 min                  |
| 17. Fab 1/25                                           | 10 min                 |
| 18. serum-free protein block                           | 10 min                 |
| 19. Primary antibodies 3                               | 1 hour                 |
| 20. Bond wash                                          | 3 min                  |
| 21. 3rd Qdot conjugated Secondary antibody             | 30 min                 |
| 22. Bond wash                                          | 3 min                  |
| 23. Fab 1/25                                           | 10 min                 |
| 24. serum-free protein block                           | 10 min                 |
| 25. Primary antibodies 1                               | 1 hour                 |
| 26. Bond wash                                          | 3 min                  |
| 27. 4th Qdot conjugated Secondary antibody             | 30 min                 |
| 28. Bond wash                                          | 3 min                  |
| 29. Fab 1/25                                           | 10 min                 |
| 30. serum-free protein block                           | 10 min                 |
| 31. Bond wash                                          | 5 min                  |

- |                                   |                 |
|-----------------------------------|-----------------|
| 32. Q-nuclear red                 | 20 min          |
| 33. Tap water                     | rinse briefly   |
| 34. Alcohol                       | Through 4 baths |
| 35. Xylene                        | Through 2 baths |
| 36. Mount in cytoseal or Ecomount |                 |

| <b>Item</b>                       | <b>Cat number</b>                                                 |
|-----------------------------------|-------------------------------------------------------------------|
| Avidin/Biotin blocking kit        | Vector SP-2001                                                    |
| Antibody diluent (1°Ab, Qdots)    | Leica, AR9352                                                     |
| Background reducing diluent(2°Ab) | DAKO, S3022                                                       |
| Serum-free protein block          | Dako, X0909                                                       |
| Bond Wash                         | Leica, AR9590                                                     |
| Q nuclear red                     | LifeTechnologies Q10363                                           |
| Mounting medium                   | Cytoseal Richard-Allen Scientific 8310-4<br>Ecomount MP-EM897-100 |

## Protocol 4 : Final method

### Example for 4 Qdot conjugated secondary and 1 streptavidin Qdot.

1. Xylene 15 min
2. Alcohol Through 4 baths
3. Water 2 min
4. Retrieval EDTA (0.1mM, Ph8) 12 min @pressure
5. TBS wash 5 min
6. Avidin/Biotin block (a few drops) 20 min
7. BKRA/Tris wash 10 min
8. serum-free protein block 10 min
9. Primary antibodies 1 Overnight at 4 degrees
10. BKRA/Tris wash 3 min
11. 1st Qdot conjugated Secondary antibody 35 min
12. BKRA/Tris wash 3 min
13. Fab 2x10 min
14. serum-free protein block 10 min
15. Primary antibodies 2 35 min
16. BKRA/Tris wash 3 min
17. 2nd Qdot conjugated Secondary antibody 35 min
18. BKRA/Tris wash 3 min
19. Fab 10 min
20. serum-free protein block 10 min
21. Primary antibodies 3 35 min
22. BKRA/Tris wash 3 min
23. 3rd Qdot conjugated Secondary antibody 35 min
24. BKRA/Tris wash 3 min
25. Fab 10 min
26. serum-free protein block 10 min
27. Primary antibodies 4 35 min
28. BKRA/Tris wash 3 min
29. 4th Qdot conjugated Secondary antibody 30 min
30. BKRA/Tris wash 3 min
31. Fab 10 min
32. serum-free protein block 10 min
33. Primary antibodies 5 35 min
34. BKRA/Tris wash 3 min
35. Biotinylated Secondary antibody 35 min
36. BKRA/Tris wash 3 min
37. Streptavidin Qdot 30 min
38. BKRA/Tris wash 5 min
39. Q-nuclear red 20 min
40. BKRA/Tris wash rinse briefly 1 min
41. Alcohol Through 4 baths
42. Xylene Through 2 baths
43. Mount in Ecomount

| Item                               | Cat number   |
|------------------------------------|--------------|
| Peroxidase block                   | S2023        |
| Serum free protein block           | X0909        |
| Background reducing diluent (2°Ab) | S3022        |
| A/B blocking kit                   | SP-2001      |
| Ecomount                           | MP-EM897-100 |

All secondary antibodies are diluted in Background reducing diluent with 1 % of the appropriate serum  
 Fab diluted in Background reducing diluent with 1 % of the appropriate serum (1/25 for  $\alpha$ Rabbit 1/50 for  $\alpha$ mouse)

The protocol can be scaled to the appropriate number of markers preliminary. Cross reactivity need to be tested prior to use in multiplex. Sera, Fab and secondaries need to be carefully chosen to prevent cross reactivity.

| <b>Primary antibodies</b>           |            |                                                                                                             |
|-------------------------------------|------------|-------------------------------------------------------------------------------------------------------------|
| Sigma                               | HPA000635  | HMOX1 rabbit anti-human antibody (HO1)                                                                      |
| Serotec                             | MCA1853    | CD163 Mouse anti-human antibody                                                                             |
| Sigma                               | HPA004114  | CD206 rabbit anti-human antibody                                                                            |
| Abcam                               | ab32144    | Anti-CCR2 [E68] antibody (ab32144)                                                                          |
| Abcam                               | Ab6671     | Anti-TNF alpha antibody                                                                                     |
| Abcam                               | Ab7856     | Anti MHCII                                                                                                  |
| Dako                                | M087601-2  | CD68, clone PG-M1                                                                                           |
| <b>Secondary Ab</b>                 |            |                                                                                                             |
| Dako                                | E043201-8  | Rabbit Ig biotinylated                                                                                      |
| Abcam                               | ab6899     | Donkey anti-sheep IgG H+L (Biotin)                                                                          |
| Abcam                               | Ab97258    | Goat polyclonal Secondary Antibody to Mouse IgG3                                                            |
| Dako                                | E043301-2  | Mouse Ig Biotinylated                                                                                       |
| Sigma                               | SAB3700976 | Anti-Rabbit IgG (H+L), F(ab) fragment antibody produced in donkey                                           |
| Sigma                               | R5506      | Anti-Rabbit IgG (whole molecule) antibody produced in goat                                                  |
| <b>Qdot conjugated secondary Ab</b> |            |                                                                                                             |
| Life Technologies                   | Q22074     | Qdot 525 Donkey anti-rabbit IgG conjugate                                                                   |
| Life Technologies                   | Q11631MP   | Qdot 565 goat F(ab') <sub>2</sub> anti-Rat IgG conjugate                                                    |
| Life Technologies                   | Q22079     | Qdot 585 Donkey anti-mouse IgG conjugate                                                                    |
| Life Technologies                   | Q22083     | Qdot 605 Donkey anti-rabbit IgG conjugate                                                                   |
| Life Technologies                   | Q11022MP   | Qdot 655 goat F(ab') <sub>2</sub> anti-mouse IgG conjugate                                                  |
| Life Technologies                   | Q11461MP   | Qdot 705 goat F(ab') <sub>2</sub> anti-rabbit IgG conjugate                                                 |
| Life Technologies                   | Q22073     | Qdot™ 525 donkey anti-mouse IgG conjugate (H+L)                                                             |
| Life Technologies                   | Q22076     | Qdot™ 565 donkey anti-mouse IgG conjugate (H+L)                                                             |
| Life Technologies                   | Q22077     | Qdot™ 565 donkey anti-rabbit IgG conjugate (H+L)                                                            |
| Life Technologies                   | Q22080     | Qdot™ 585 donkey anti-rabbit IgG conjugate (H+L)                                                            |
| Life Technologies                   | Q22082     | Qdot™ 605 donkey anti-mouse IgG conjugate (H+L)                                                             |
| Life Technologies                   | Q22085     | Qdot™ 625 donkey anti-mouse IgG conjugate (H+L)                                                             |
| Life Technologies                   | Q22086     | Qdot™ 625 donkey anti-rabbit IgG conjugate (H+L)                                                            |
| Life Technologies                   | Q22088     | Qdot™ 655 donkey anti-mouse IgG conjugate (H+L), Qdot™ VIVID                                                |
| Life Technologies                   | Q22089     | Qdot™ 655 donkey anti-rabbit IgG conjugate (H+L), Qdot™ VIVID                                               |
| Life Technologies                   | Q11062MP   | Qdot™ 705 Goat F(ab') <sub>2</sub> Anti-Mouse IgG Conjugate (H+L), 1 $\mu$ M solution highly cross-adsorbed |
| <b>Qdot streptavidin conjugates</b> |            |                                                                                                             |
| Invitrogen                          | Q10141MP   | Qdot® 525 Streptavidin Conjugate                                                                            |
| Invitrogen                          | Q10131MP   | Qdot® 565 Streptavidin Conjugate                                                                            |
| Invitrogen                          | Q10101MP   | Qdot® 605 Streptavidin Conjugate                                                                            |
| Invitrogen                          | A10196     | Qdot® 625 Streptavidin Conjugate                                                                            |
| Invitrogen                          | Q10121MP   | Qdot® 655 Streptavidin Conjugate                                                                            |
| Invitrogen                          | Q10161MP   | Qdot® 705 Streptavidin Conjugate                                                                            |
| Invitrogen                          | Q10111MP   | Q dot 585                                                                                                   |

| <b>Mounting media</b>  |              |                                                      |
|------------------------|--------------|------------------------------------------------------|
| A Menarini diagnostics | MP-EM897-100 | Ecomount                                             |
| Invitrogen             | Q10336       | Q mount Q dot mounting media                         |
| Thermo Fisher          | 8310-4       | Richard Allan Scientific cytooseal 60                |
| <b>Others</b>          |              |                                                      |
| Dako                   | S3022        | background reducing antibody diluent                 |
| Dako                   | S2023        | Peroxidase-Blocking Solution, Dako REAL™             |
| Dako                   | X0909        | protein block, serum free                            |
| Sigma                  | D9663-10ml   | Donkey serum                                         |
| Sigma                  | G6767-500ml  | Goat serum                                           |
| Invitrogen             | Q10363       | Qnuclear deep red stain                              |
| Life Technologies      | Q20001MP     | Qdot incubation buffer                               |
| Stratech Scientific    | 715-007-003  | AffiniPure Fab fragment Donkey Anti-Mouse IgG (H+L)  |
| Stratech Scientific    | 711-007-003  | AffiniPure Fab fragment Donkey Anti-Rabbit IgG (H+L) |
| Vector                 | SP-2001      | Avidin/biotin blocking kit                           |
